# Supplementary material for: Environmental and Behavioural Determinants of Leptospirosis Transmission: A Systematic Review
Source: PubMed Central journal article supplement (PMC4574979; doi:10.1371/journal.pntd.0003843), 2015-09-17

**Supplementary web material 1 - Environmental and Behavioural Determinants of  
Leptospirosis Transmission: A systematic review**

|                                                                                                                  |    |
|------------------------------------------------------------------------------------------------------------------|----|
| Appendix 1: References for eligible studies                                                                      | 2  |
| Appendix 2: Risk factors on water, agriculture and landscape by geographic regions                               | 7  |
| Appendix 3: Risk factors concerning socio economics, sanitation and behaviour stratified by geographic locations | 8  |
| Appendix 4: Animal risk factors stratified by geographic locations                                               | 9  |
| Appendix 5: Risk factors stratified by study type                                                                | 10 |
| Appendix 6: Risk factors stratified by study population                                                          | 11 |

## Appendix 1: References for eligible studies

- Agampodi, S.B., Nugegoda, D.B., Thevanesam, V., Vinetz, J.M., 2015. Characteristics of rural leptospirosis patients admitted to referral hospitals during the 2008 leptospirosis outbreak in Sri Lanka: implications for developing public health control measures. *Am. J. Trop. Med. Hyg.* 92, 139–144. doi:10.4269/ajtmh.14-0465
- Aguiar, D., Cavalcante, G., Camargo, L., Labruna, M., Vasconcellos, S., Souza, G., Gennari, S., 2007. Anti-*Leptospira* Spp And Anti-*Brucella* Spp Antibodies In Humans From Rural Area Of Monte Negro Municipality , State Of Rondônia , Brazilian Western Amazon. *Brazilian Journal of Microbiology* 38, 93–96.
- Almeida, L.P. de, Martins, L.F. da S., Brod, C.S., 1999. Fatores de risco associados à presença de anticorpos antileptospira em trabalhadores do serviço de saneamento ambiental. *Ciência Rural* 29, 511–516.
- Ashford, D.A., Kaiser, R.M., Spiegel, R.A., Perkins, B.A., Weyant, R.S., Bragg, S.L., Plikaytis, B., Jarquin, C., De Lose Reyes, J.O., Amador, J.J., 2000. Asymptomatic infection and risk factors for leptospirosis in Nicaragua. *The American Journal of Tropical Medicine and Hygiene* 63, 249–254.
- Awosanya, E.J., Nguku, P., Oyemakinde, A., Omobowale, O., 2013. Factors associated with probable cluster of leptospirosis among kennel workers in Abuja, Nigeria. *Pan Afr Med J* 16, 144. doi:10.11604/pamj.2013.16.144.3529
- Barcellos, C., Sabroza, P.C., 2001. The place behind the case: leptospirosis risks and associated environmental conditions in a flood-related outbreak in Rio de Janeiro. *Cad Saude Publica* 17 Suppl, 59–67.
- Bhardwaj, P., Kosambiya, J.K., Desai, V.K., 2008. A case control study to explore the risk factors for acquisition of leptospirosis in Surat city, after flood. *Indian J Med Sci* 62, 431–438.
- Boland, M., Sayers, G., Coleman, T., Bergin, C., Sheehan, N., Creamer, E., O’Connell, M., Jones, L., Zochowski, W., 2004. A cluster of leptospirosis cases in canoeists following a competition on the River Liffey. *Epidemiol. Infect.* 132, 195–200.
- Bovet, P., Yersin, C., Merien, F., Davis, C.E., Perolat, P., 1999. Factors associated with clinical leptospirosis: a population-based case-control study in the Seychelles (Indian Ocean). *Int J Epidemiol* 28, 583–590.
- Bruce, M.G., Sanders, E.J., Leake, J.A.D., Zaidel, O., Bragg, S.L., Aye, T., Shutt, K.A., Deseda, C.C., Rigau-Perez, J.G., Tappero, J.W., Perkins, B.A., Spiegel, R.A., Ashford, D.A., 2005. Leptospirosis among patients presenting with dengue-like illness in Puerto Rico. *Acta Tropica* 96, 36–46. doi:10.1016/j.actatropica.2005.07.001
- Cacciapuoti, B., Ciceroni, L., Pinto, A., Apollini, M., Rondinella, V., Bonomi, U., Benedetti, E., Cinco, M., Dessì, S., Dettori, G., 1994. Survey on the prevalence of leptospira infections in the Italian population. *Eur. J. Epidemiol.* 10, 173–180.
- Cacciapuoti, B., Vellucci, A., Ciceroni, L., Pinto, A., Taggi, F., 1987. Prevalence of leptospirosis in man. Pilot survey. *Eur. J. Epidemiol.* 3, 137–142.

- Céspedes, M., Ormaeche, M., Condori, P., Balda, L., Glenny, M., 2003. Prevalencia de leptospirosis y factores de riesgo en personas con antecedentes de fiebre en la provincia de Manu, Madre de Dios, Perú. *Rev Peru Med Exp Salud Publica* 20, 180–185.
- Chan, O.Y., Chia, S.E., Nadarajah, N., Sng, E.H., 1987. Leptospirosis risk in public cleansing and sewer workers. *Ann. Acad. Med. Singap.* 16, 586–590.
- Childs, J.E., Schwartz, B.S., Ksiazek, T.G., Graham, R.R., LeDuc, J.W., Glass, G.E., 1992. Risk factors associated with antibodies to leptospires in inner-city residents of Baltimore: a protective role for cats. *Am J Public Health* 82, 597–599.
- Chusri, S., Sritrairatchai, S., Hortiwahul, T., Charoenmak, B., Silpapojakul, K., 2012. Leptospirosis among river water rafters in Satoon, southern Thailand. *J Med Assoc Thai* 95, 874–877.
- Colt, S., Pavlin, B.I., Kool, J.L., Johnson, E., McCool, J.P., Woodward, A.J., 2014. Human leptospirosis in The Federated States of Micronesia: a hospital-based febrile illness survey. *BMC Infect. Dis.* 14, 186. doi:10.1186/1471-2334-14-186
- Coudert, C., Beau, F., Berlioz-Arthaud, A., Melix, G., Devaud, F., Boyeau, E., Jaomeau, C., Lablee, P., Jarno, P., 2007. [Human leptospirosis in French Polynesia. Epidemiological, clinical and bacteriological features]. *Med Trop (Mars)* 67, 137–144.
- Cruz M., R., Fernández V., F., Arévalo R., H., 2002. Hiperendemicidad de Leptospirosis y factores de riesgo asociados en localidades arroceras del departamento de San Martín - Perú. *Rev Peru Med Exp Salud Pública* 19, 10–16.
- Damude, D.F., Jones, C.J., Myers, D.M., 1979. A study of leptospirosis among animals in Barbados W.I. *Trans. R. Soc. Trop. Med. Hyg.* 73, 161–168.
- De Serres, G., Levesque, B., Higgins, R., Major, M., Laliberté, D., Boulianne, N., Duval, B., 1995. Need for vaccination of sewer workers against leptospirosis and hepatitis A. *Occup Environ Med* 52, 505–507.
- De Vasconcelos, L.M., Ramos-Vieira M das, N., Osório-Cisalpino, E., Cota-Koury, M., 1993. [Survey of anti-Leptospira agglutinins in workers from the city of Londrina-Paraná, Brazil]. *Rev. Latinoam. Microbiol.* 35, 153–157.
- Demers, R.Y., Frank, R., Demers, P., Clay, M., 1985. Leptospiral exposure in Detroit rodent control workers. *Am J Public Health* 75, 1090–1091.
- Demers, R.Y., Thiermann, A., Demers, P., Frank, R., 1983. Exposure to *Leptospira icterohaemorrhagiae* in inner-city and suburban children: a serologic comparison. *J Fam Pract* 17, 1007–1011.
- Díaz P, L., Zapata, I., Góngora O, A., Parra A, J., Aponte G, L., Gómez L, L., 2008. Detección De Anticuerpos IgM A *Leptospira* En Humanos En Riesgo Ocupacional En Villavicencio, Meta. *Revista MVZ Córdoba* 13, 1120–1127.
- Douglin, C.P., 1997. Risk Factors for Severe Leptospirosis in the Parish of St. Andrew, Barbados. *Emerging Infectious Diseases* 3, 78–80. doi:10.3201/eid0301.970114
- Dreyfus, A., Benschop, J., Collins-Emerson, J., Wilson, P., Baker, M.G., Heuer, C., 2014. Sero-prevalence and risk factors for leptospirosis in abattoir workers in New Zealand. *Int J Environ Res Public Health* 11, 1756–1775. doi:10.3390/ijerph110201756

- Everard, C.O., Edwards, C.N., Everard, J.D., Carrington, D.G., 1995. A twelve-year study of leptospirosis on Barbados. *Eur. J. Epidemiol.* 11, 311–320.
- Everard, C.O., Hayes, R.J., Edwards, C.N., 1989. Leptospiral infection in school-children from Trinidad and Barbados. *Epidemiology and Infection* 103, 143–156.
- Everard, C.O., Hayes, R.J., Fraser-Chanpong, G.M., 1985. A serosurvey for leptospirosis in Trinidad among urban and rural dwellers and persons occupationally at risk. *Trans. R. Soc. Trop. Med. Hyg.* 79, 96–105.
- Ezeh, A.O., Adesiyun, A.A., Addo, P.B., Ellis, W.A., Makinde, A.A., Bello, C.S., 1991. Serological and cultural examination for human leptospirosis in Plateau State, Nigeria. *Cent Afr J Med* 37, 11–15.
- Felzemburgh, R.D.M., Ribeiro, G.S., Costa, F., Reis, R.B., Hagan, J.E., Melendez, A.X.T.O., Fraga, D., Santana, F.S., Mohr, S., dos Santos, B.L., Silva, A.Q., Santos, A.C., Ravines, R.R., Tassinari, W.S., Carvalho, M.S., Reis, M.G., Ko, A.I., 2014. Prospective study of leptospirosis transmission in an urban slum community: role of poor environment in repeated exposures to the *Leptospira* agent. *PLoS Negl Trop Dis* 8, e2927. doi:10.1371/journal.pntd.0002927
- Gill, O.N., Coghlan, J.D., Calder, I.M., 1985. The risk of leptospirosis in United Kingdom fish farm workers. Results from a 1981 serological survey. *The Journal of Hygiene* 94, 81–86.
- Gonçalves, D.D., Teles, P.S., Reis, C.R. dos, Lopes, F.M.R., Freire, R.L., Navarro, I.T., Alves, L.A., Muller, E.E., Freitas, J.C. de, 2006. Seroepidemiology and occupational and environmental variables for leptospirosis, brucellosis and toxoplasmosis in slaughterhouse workers in the Paraná State, Brazil. *Revista do Instituto de Medicina Tropical de São Paulo* 48, 135–140. doi:10.1590/S0036-46652006000300004
- Herrmann-Storck, C., Brioude, A., Quirin, R., Deloumeaux, J., Lamaury, I., Nicolas, M., Postic, D., Perez, J.M., 2005. Retrospective review of leptospirosis in Guadeloupe, French West Indies 1994-2001. *West Indian Med J* 54, 42–46.
- Hogerzeil, H.V., Terpstra, W.J., De Geus, A., Korver, H., 1986. Leptospirosis in rural Ghana. *Trop Geogr Med* 38, 162–166.
- Karande, S., Bhatt, M., Kelkar, A., Kulkarni, M., De, A., Varaiya, A., 2003. An observational study to detect leptospirosis in Mumbai, India, 2000. *Archives of Disease in Childhood* 88, 1070–1075. doi:10.1136/adc.88.12.1070
- Kawaguchi, L., Sengkeopraseuth, B., Tsuyuoka, R., Koizumi, N., Akashi, H., Vongphrachanh, P., Watanabe, H., Aoyama, A., 2008. Seroprevalence of leptospirosis and risk factor analysis in flood-prone rural areas in Lao PDR. *Am. J. Trop. Med. Hyg.* 78, 957–961.
- Keenan, J., Ervin, G., Aung, M., McGwin, G., Jolly, P., 2010. Risk factors for clinical leptospirosis from Western Jamaica. *Am. J. Trop. Med. Hyg.* 83, 633–636. doi:10.4269/ajtmh.2010.09-0609
- Koay, T.K., Nirmal, S., Noitie, L., Tan, E., 2004. An epidemiological investigation of an outbreak of leptospirosis associated with swimming, Beaufort, Sabah. *Med. J. Malaysia* 59, 455–459.

- Krawczyk, M., 2004. [Estimation of transmission hazard of *Leptospira* Sp. infections in 2 groups of people]. *Przegl Epidemiol* 58, 207–212.
- Leal-Castellanos, C.B., García-Suárez, R., González-Figueroa, E., Fuentes-Allen, J.L., Escobedo-de la Peñal, J., 2003. Risk factors and the prevalence of leptospirosis infection in a rural community of Chiapas, Mexico. *Epidemiol. Infect.* 131, 1149–1156.
- Lhomme, V., Grolier-Bois, L., Jouannelle, J., Elisabeth, L., 1996. Leptospirose en Martinique de 1987 à 1992: bilan d'une étude épidémiologique, clinique et biologique. *Med Mal Infect* 26, 94–98.
- Manocha, H., Ghosha, U., Singh, S., Kishore, J., Ayyagari, A., 2004. Frequency of leptospirosis in patients of acute febrile illness in Uttar Pradesh. *Journal of the Association of Physicians India* 52, 623–625.
- Morgan, J., Bornstein, S.L., Karpati, A.M., Bruce, M., Bolin, C.A., Austin, C.C., Woods, C.W., Lingappa, J., Langkop, C., Davis, B., Graham, D.R., Proctor, M., Ashford, D.A., Bajani, M., Bragg, S.L., Shutt, K., Perkins, B.A., Tappero, J.W., 2002. Outbreak of leptospirosis among triathlon participants and community residents in Springfield, Illinois, 1998. *Clin. Infect. Dis.* 34, 1593–1599. doi:10.1086/340615
- Murhekar, M.V., Sugunan, A.P., Vijayachari, P., Sharma, S., Sehgal, S.C., 1998. Risk factors in the transmission of leptospiral infection. *Indian J. Med. Res.* 107, 218–223.
- Najera, S., Alvis, N., Babilonia, D., Alvarez, L., Mattar, S., 2005. Leptospirosis ocupacional en una región del Caribe colombiano. *Salud Publica de Mexico* 47, 240–244.
- Nardone, A., Campèse, C., Capek, I., 2002. Les facteurs de risques de leptospirose en France métropolitaine Une étude cas-témoin, juillet 1999 - février 2000. Institut de veille sanitaire, Saint-Maurice, France.
- Natarajaseenivasan, K., Boopalan, M., Selvanayaki, K., Suresh, S.R., Ratnam, S., 2002. Leptospirosis among rice mill workers of Salem, South India. *Jpn. J. Infect. Dis.* 55, 170–173.
- Padmanabha, H., Hidalgo, M., Valbuena, G., Castaneda, E., Galeano, A., Puerta, H., Cantillo, C., Mantilla, G., 2009. Geographic variation in risk factors for SFG rickettsial and leptospiral exposure in Colombia. *Vector Borne Zoonotic Dis.* 9, 483–490. doi:10.1089/vbz.2008.0092
- Phraisuwan, P., Whitney, E.A.S., Tharmaphornpilas, P., Guharat, S., Thongkamsamut, S., Aresagig, S., Liangphongphanthu, J., Junthima, K., Sokampang, A., Ashford, D.A., 2002. Leptospirosis: skin wounds and control strategies, Thailand, 1999. *Emerging Infect. Dis.* 8, 1455–1459. doi:10.3201/eid0812.020180
- Rachou, E., Riquebourg, M., Yovanovitch, J., 2004. La Leptospirose Humaine A La Reunion En 2003 Resultats D'une Etude Cas-Temoins. Observatoire Régional de la Santé, Réunion.
- Rafizah, A.A.N., Aziah, B.D., Azwany, Y.N., Imran, M.K., Rusli, A.M., Nazri, S.M., Nikman, A.M., Nabilah, I., Asma', H.S., Zahiruddin, W.M., Zaliha, I., 2013. Risk factors of leptospirosis among febrile hospital admissions in northeastern Malaysia. *Prev Med* 57 Suppl, S11–13. doi:10.1016/j.jpmed.2012.12.017

- Sampasa-Kanyinga, H., Lévesque, B., Anassour-Laouan-Sidi, E., Côté, S., Serhir, B., Ward, B.J., Libman, M.D., Drebot, M.A., Ndao, M., Dewailly, E., 2012. Zoonotic infections in native communities of James Bay, Canada. *Vector Borne Zoonotic Dis.* 12, 473–481. doi:10.1089/vbz.2011.0739
- Sarkar, U., Nascimento, S., Barbosa, R., Martins, R., Nuevo, H., Kalafanos, I., Grunstein, I., Flannery, B., Dias, J., Riley, L., Reis, M., Ko, A., 2002. Population-based case-control investigation of risk factors for leptospirosis during an urban epidemic. *American Journal of Tropical Medicine and Hygiene* 66, 605–610.
- Sharma, S., Vijayachari, P., Sugunan, A.P., Natarajaseenivasan, K., Sehgal, S.C., 2006. Seroprevalence of leptospirosis among high-risk population of Andaman Islands, India. *Am. J. Trop. Med. Hyg.* 74, 278–283.
- Silva, H.R., Tavares-Neto, J., Bina, J.C., Meyer, R., 2003. Leptospirase-infecção e forma subclínica em crianças de Salvador, Bahia. *Revista da Sociedade Brasileira de Medicina Tropical* 36, 227–233.
- Storck, C.H., Postic, D., Lamaury, I., Perez, J.M., 2008. Changes in epidemiology of leptospirosis in 2003--2004, a two El Niño Southern Oscillation period, Guadeloupe archipelago, French West Indies. *Epidemiol. Infect.* 136, 1407–1415. doi:10.1017/S0950268807000052
- Sugunan, A.P., Vijayachari, P., Sharma, S., Roy, S., Manickam, P., Natarajaseenivasan, K., Gupte, M.D., Sehgal, S.C., 2009. Risk factors associated with leptospirosis during an outbreak in Middle Andaman, India. *Indian J. Med. Res.* 130, 67–73.
- Tangkanakul, W., Tharmaphornpil, P., Plikaytis, B.D., Bragg, S., Poonsuksombat, D., Choomkasien, P., Kingnate, D., Ashford, D.A., 2000. Risk factors associated with leptospirosis in northeastern Thailand, 1998. *Am. J. Trop. Med. Hyg.* 63, 204–208.
- Trevejo, R.T., Rigau-Pérez, J.G., Ashford, D.A., McClure, E.M., Jarquín-González, C., Amador, J.J., de los Reyes, J.O., Gonzalez, A., Zaki, S.R., Shieh, W.J., McLean, R.G., Nasci, R.S., Weyant, R.S., Bolin, C.A., Bragg, S.L., Perkins, B.A., Spiegel, R.A., 1998. Epidemic leptospirosis associated with pulmonary hemorrhage-Nicaragua, 1995. *J. Infect. Dis.* 178, 1457–1463.
- Vado-Solís, I., Cárdenas-Marrufo, M.F., Jiménez-Delgadillo, B., Alzina-López, A., Laviada-Molina, H., Suarez-Solís, V., Zavala-Velázquez, J.E., 2002. Clinical-epidemiological study of leptospirosis in humans and reservoirs in Yucatán, México. *Rev. Inst. Med. Trop. Sao Paulo* 44, 335–340.
- Vanasco, N.B., Schmeling, M.F., Lottersberger, J., Costa, F., Ko, A.I., Tarabla, H.D., 2008. Clinical characteristics and risk factors of human leptospirosis in Argentina (1999-2005). *Acta Trop.* 107, 255–258. doi:10.1016/j.actatropica.2008.06.007
- Vijayachari, P., Sugunan, A.P., Murhekar, M.V., Sharma, S., Sehgal, S.C., 2004. Leptospirosis among schoolchildren of the Andaman & Nicobar Islands, India: low levels of morbidity and mortality among pre-exposed children during an epidemic. *Epidemiology and Infection* 132, 1115–1120.

## Appendix 2: Risk factors on water, agriculture and landscape by geographic regions

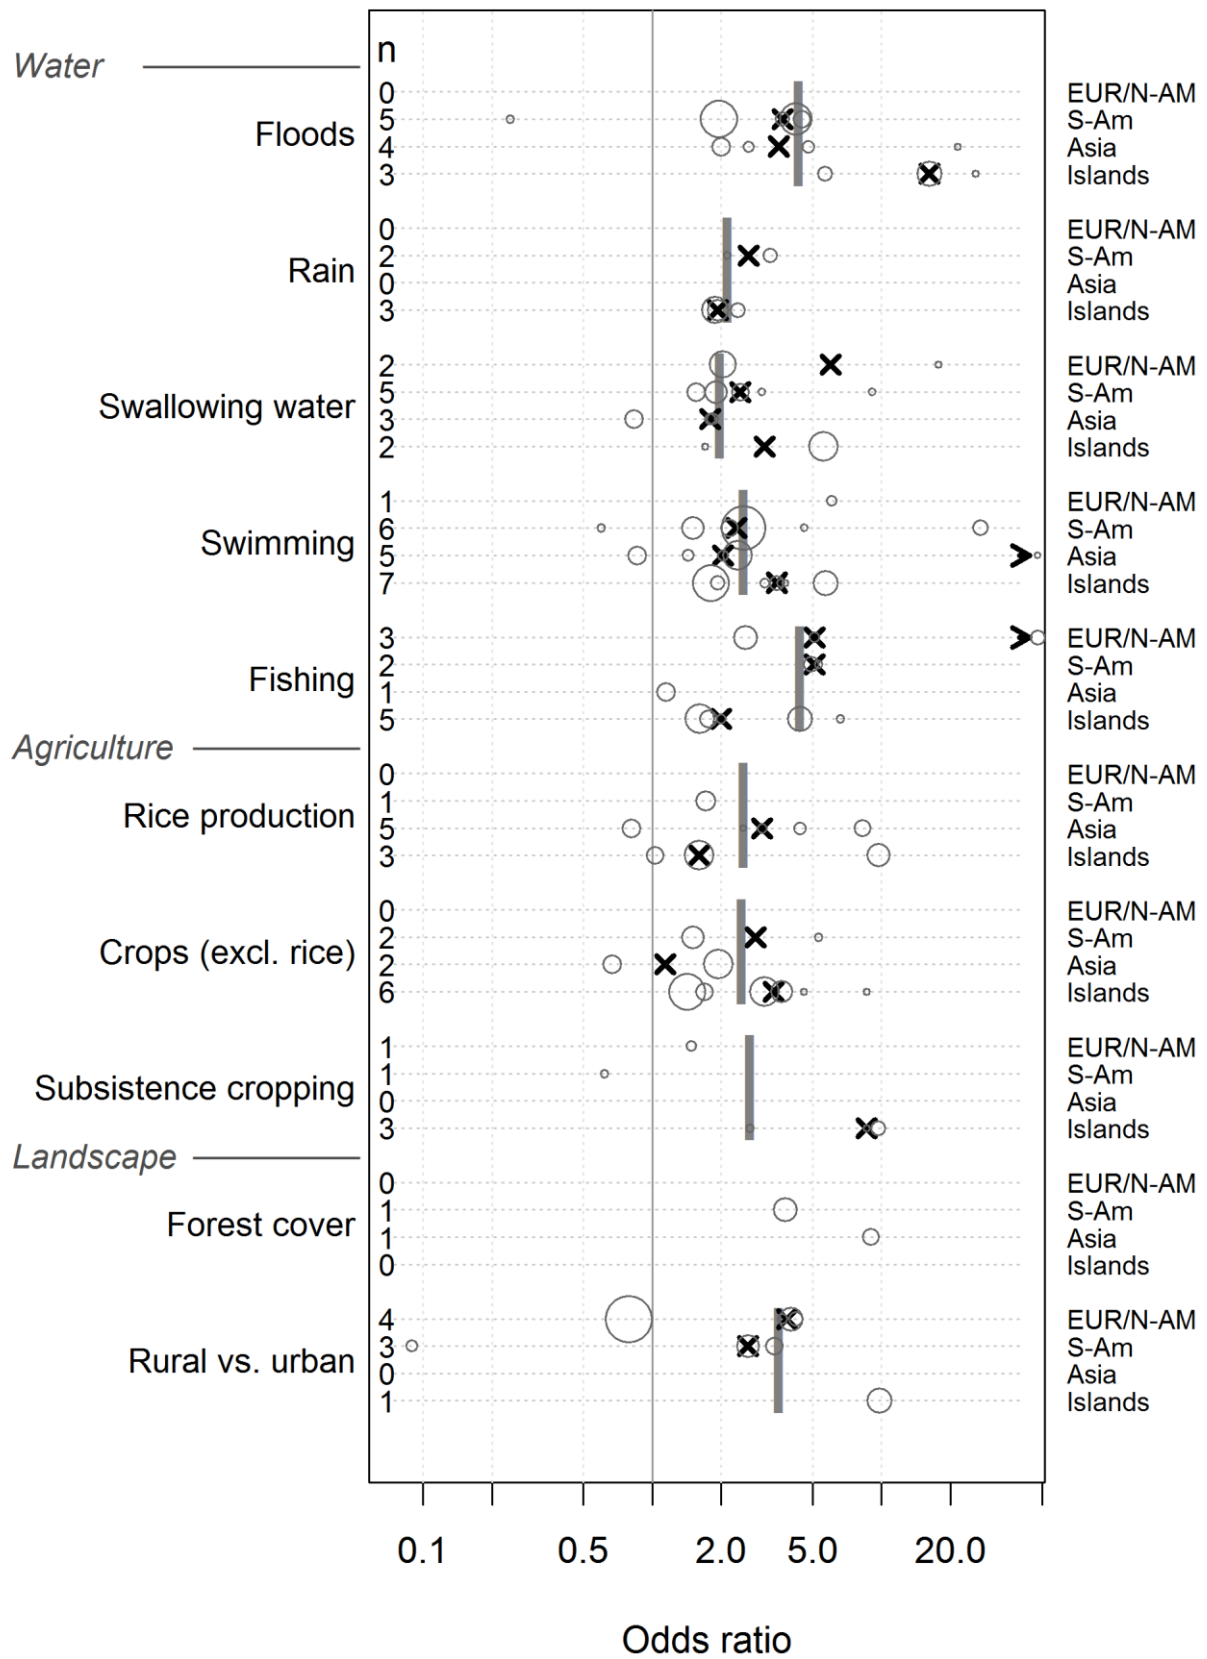

**Appendix 3: Risk factors concerning socio economics, sanitation and behaviour stratified by geographic locations**

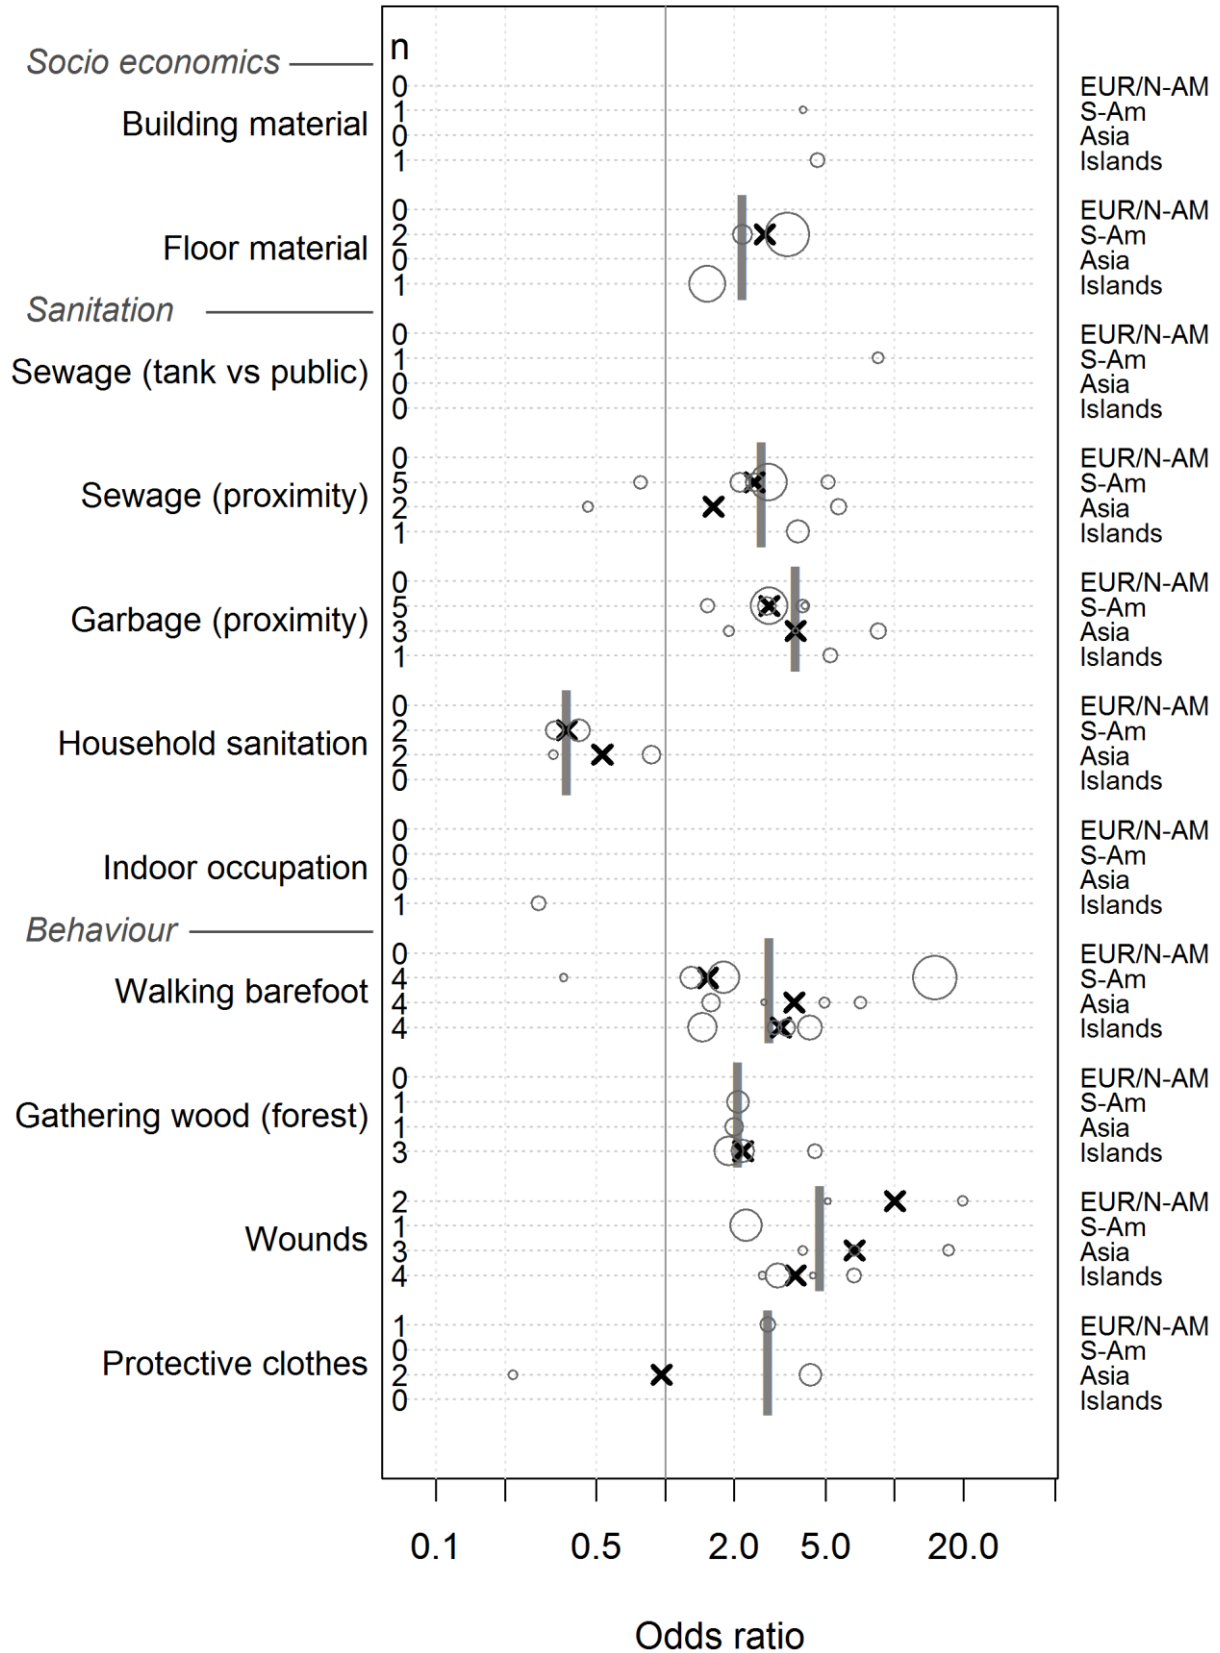



### Appendix 4: Animal risk factors stratified by geographic locations

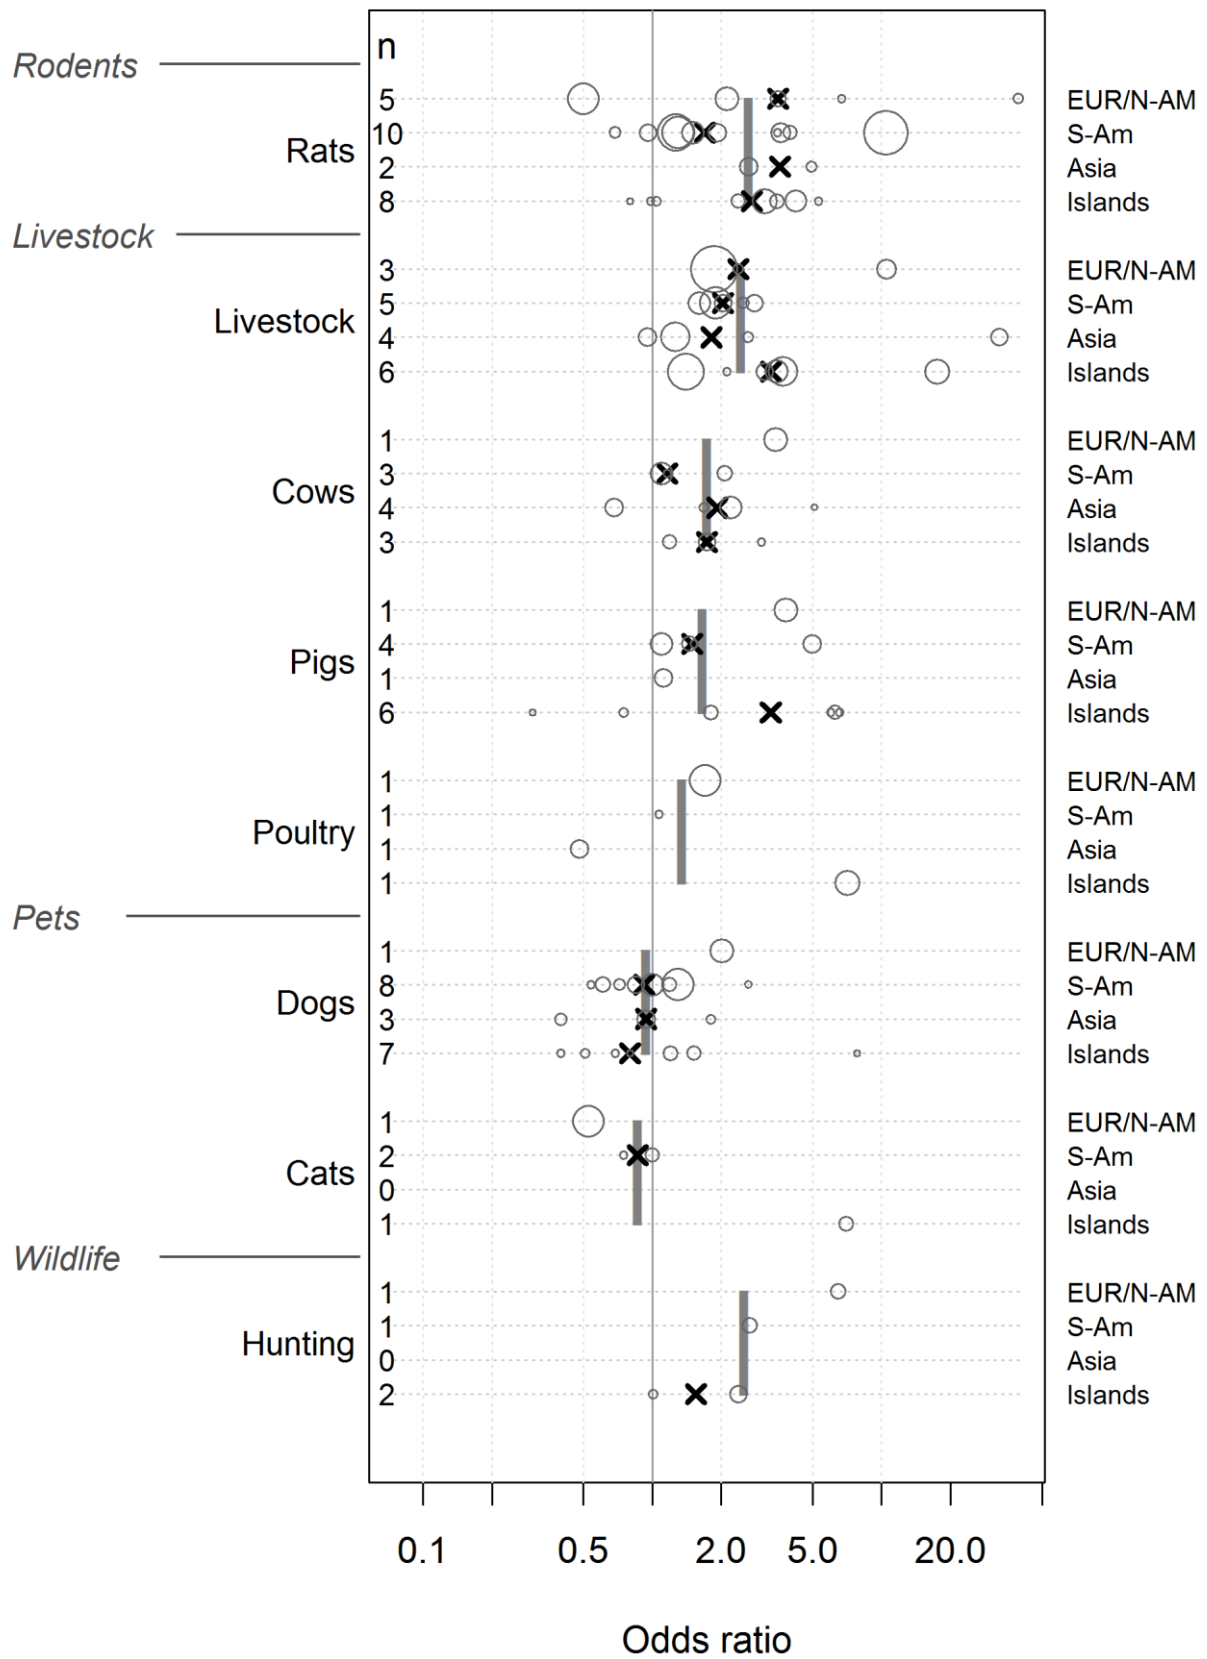

### Appendix 5: Risk factors stratified by study type

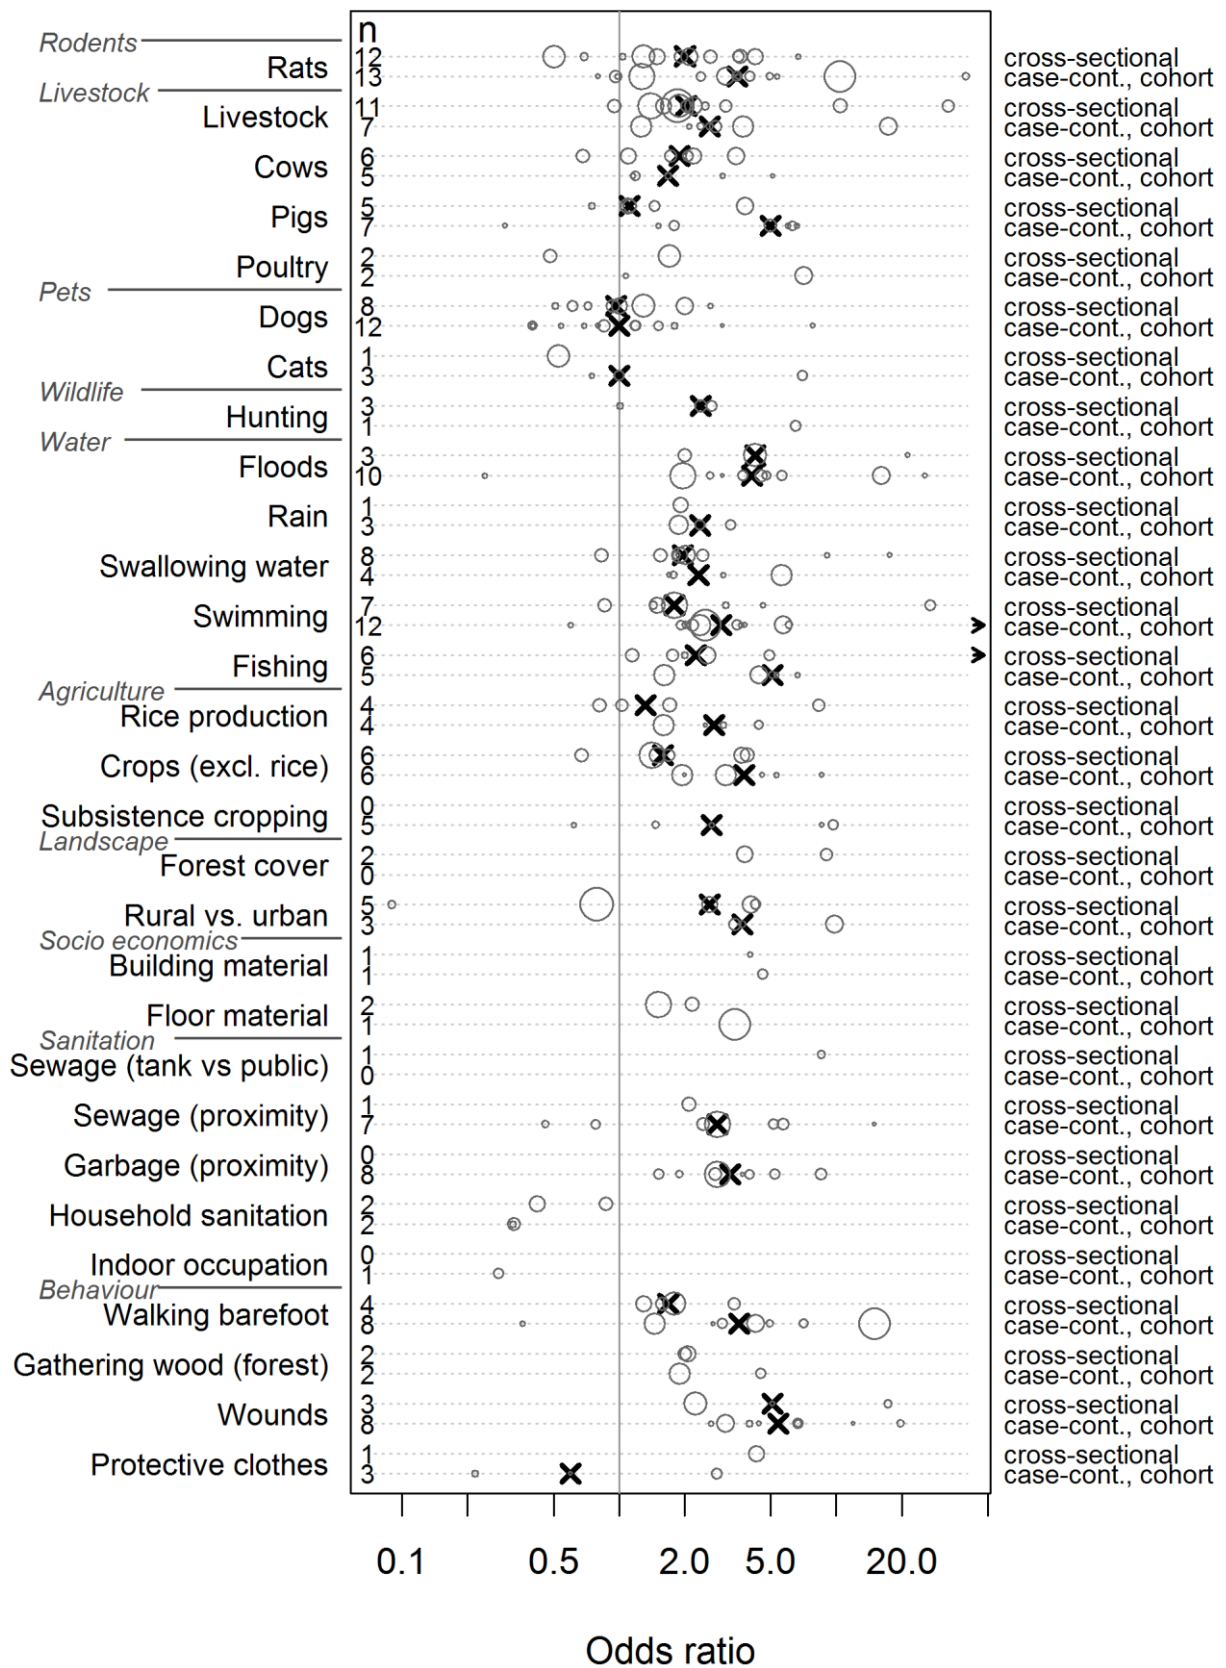

### Appendix 6: Risk factors stratified by study population

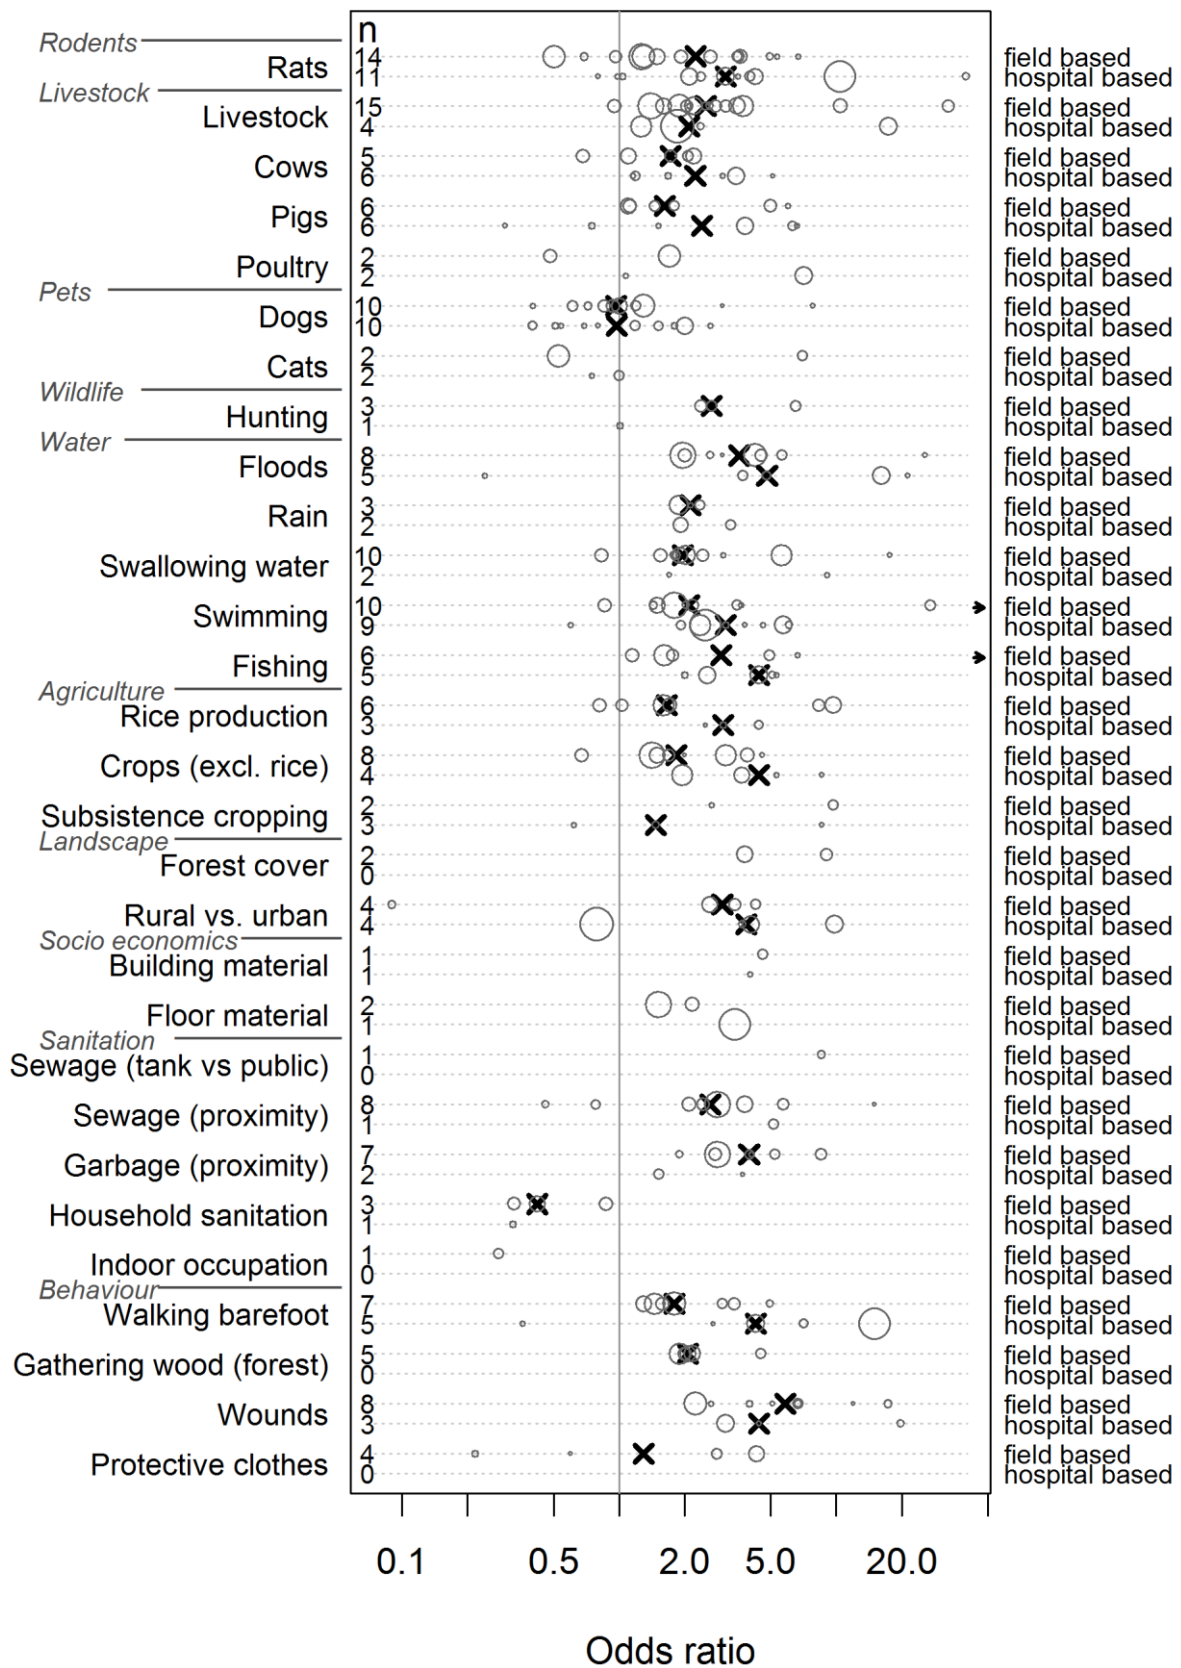

Supplement: pntd.0003843.s002.pdf [file pntd.0003843.s002.pdf]
