# Supplementary material for: Environmental and Behavioural Determinants of Leptospirosis Transmission: A Systematic Review
Source: PubMed Central journal article supplement (PMC4574979; doi:10.1371/journal.pntd.0003843), 2015-09-17

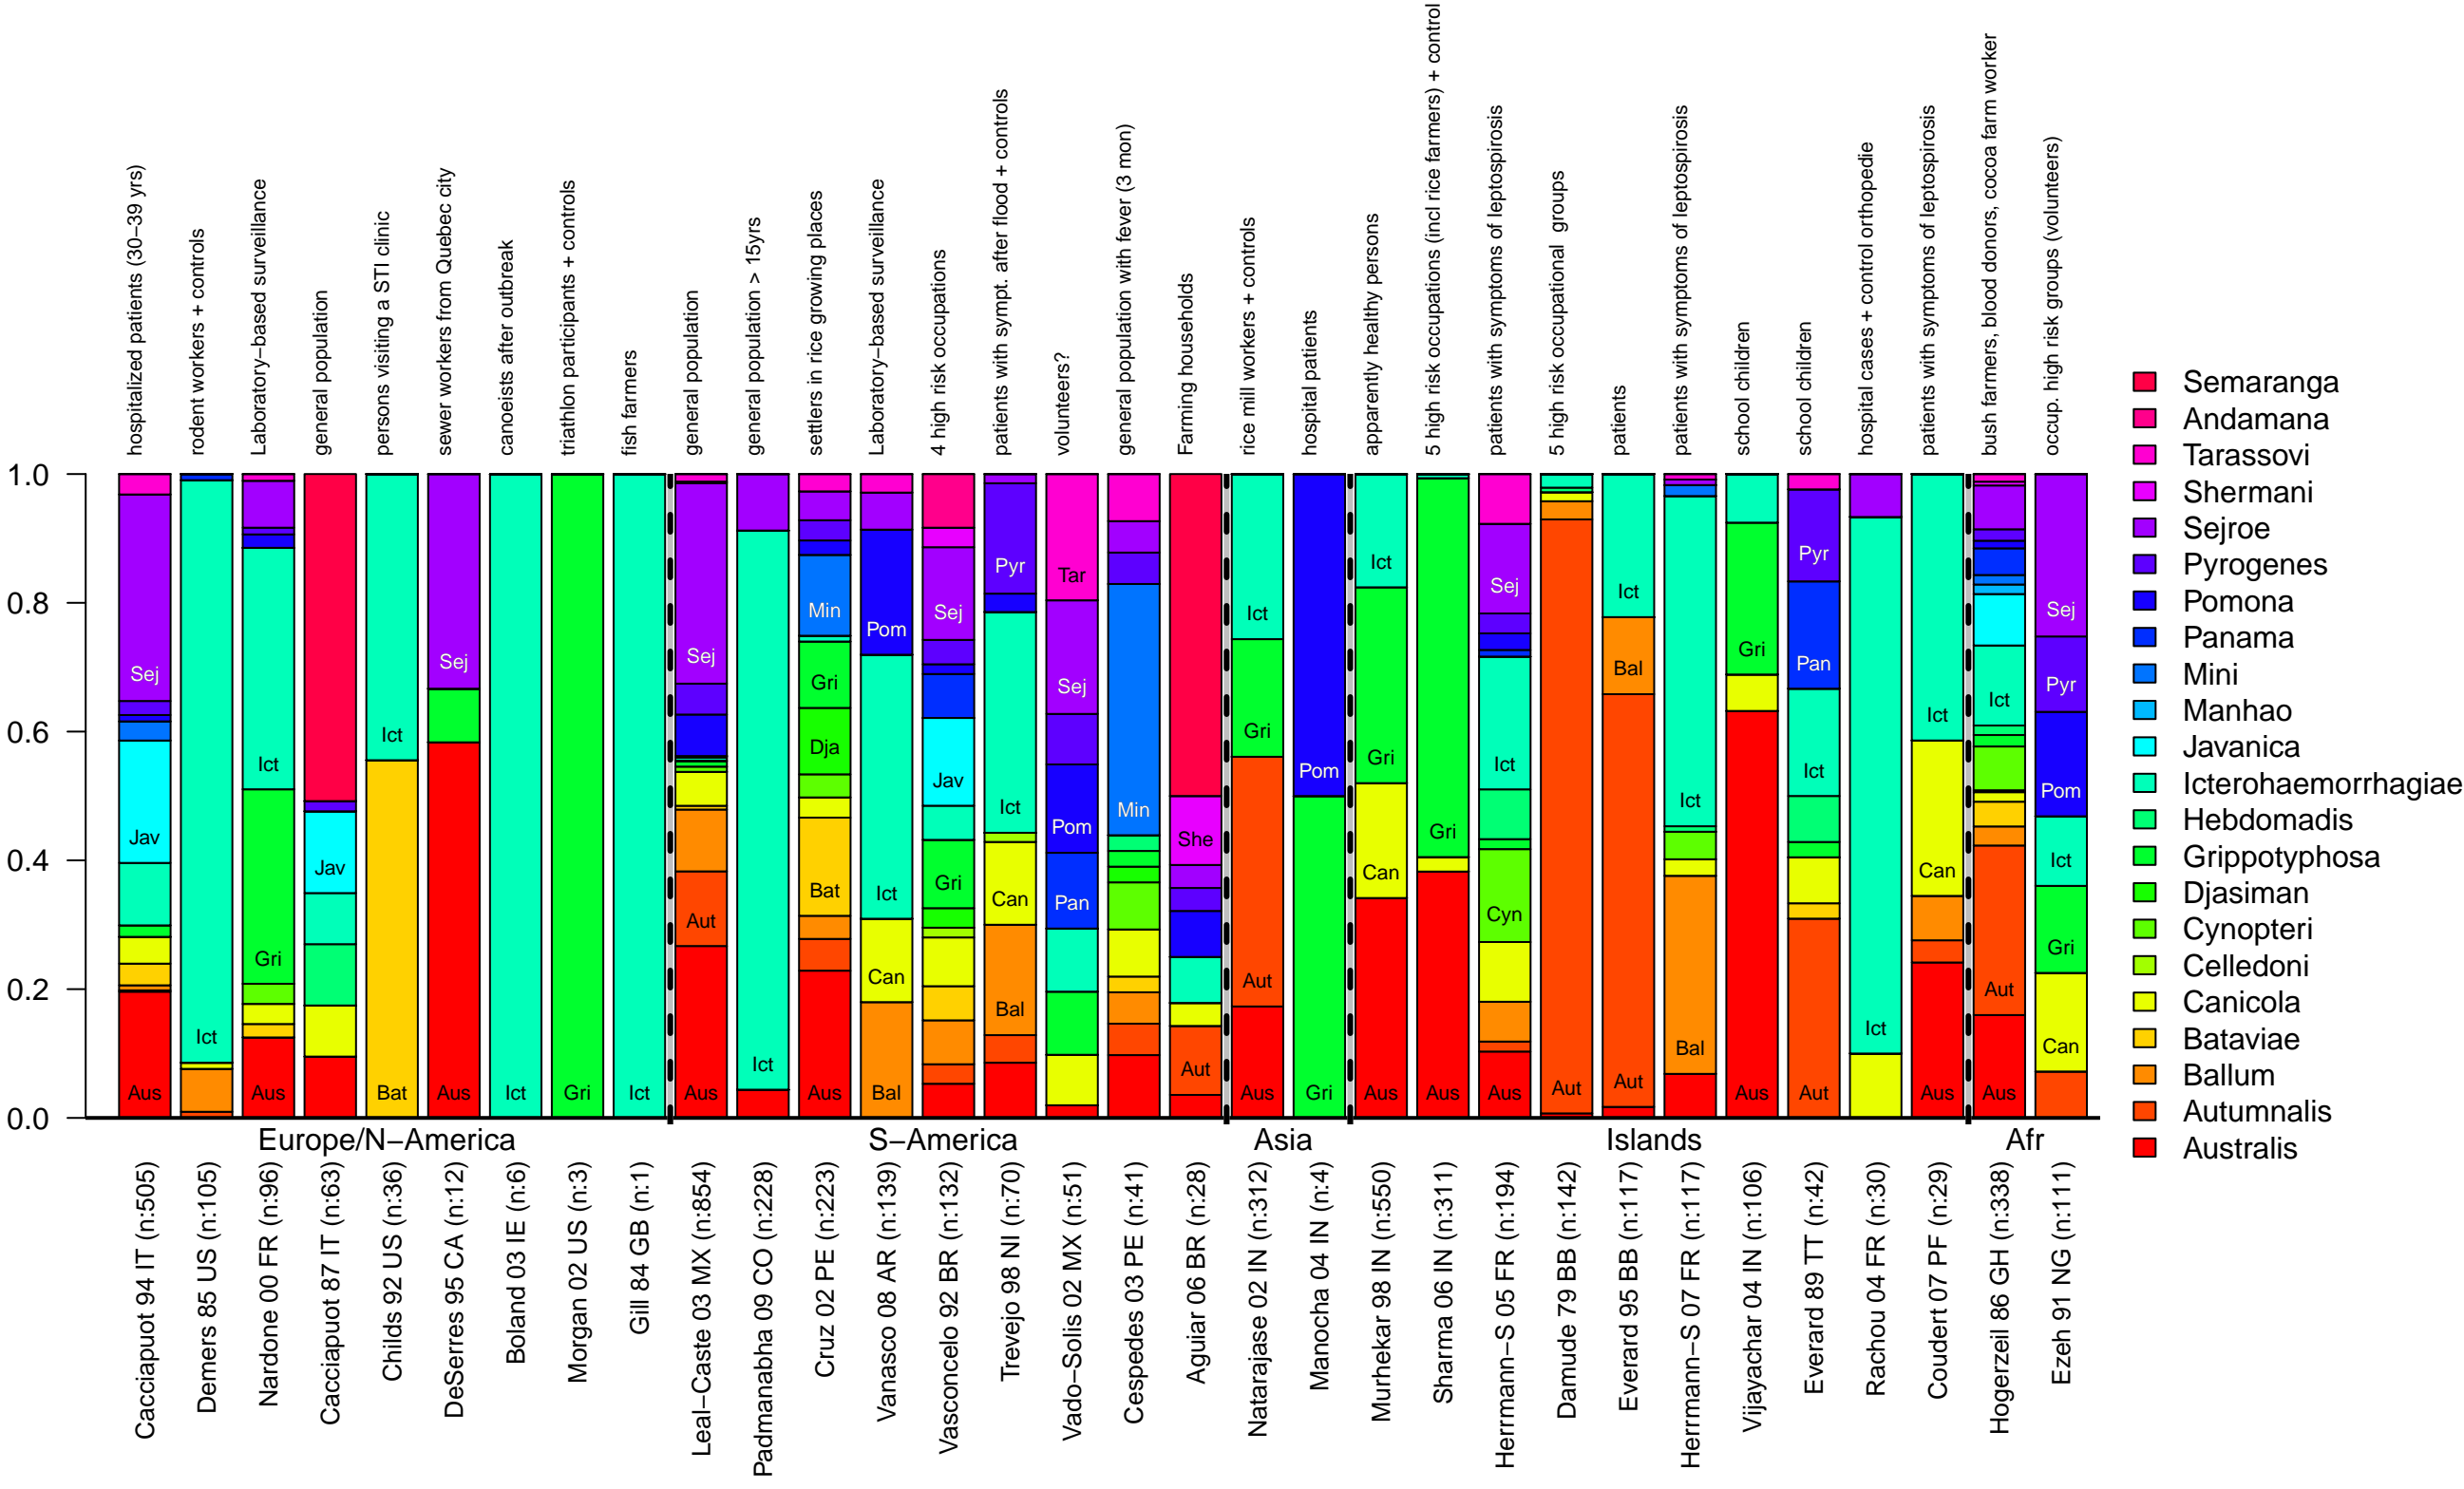

Supplement: pntd.0003843.s004.pdf [file pntd.0003843.s004.pdf]
