# Supplementary material for: Environmental and Behavioural Determinants of Leptospirosis Transmission: A Systematic Review
Source: PubMed Central journal article supplement (PMC4574979; doi:10.1371/journal.pntd.0003843), 2015-09-17
Supplement: pntd.0003843.s005.pdf [file pntd.0003843.s005.pdf]

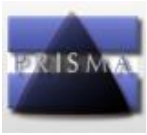

## PRISMA 2009 Flow Diagram

**Note: A more detailed diagram is provided in the manuscript (Fig. 1)**

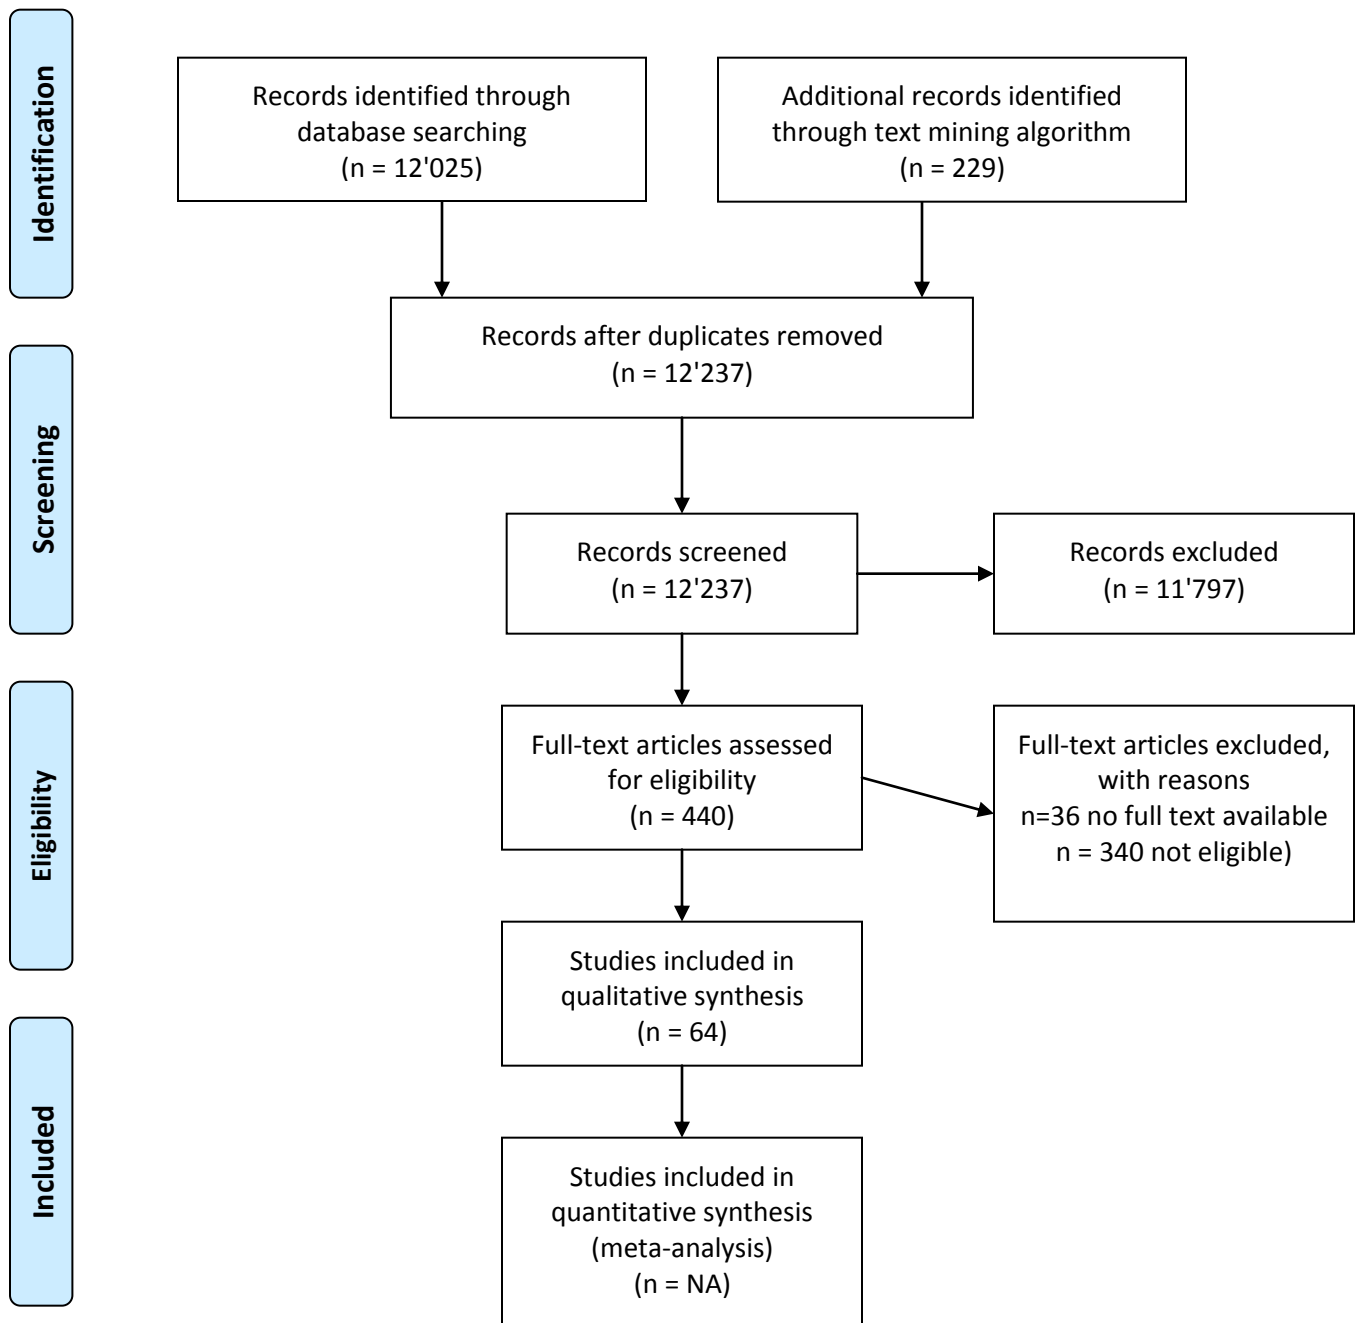

From: Moher D, Liberati A, Tetzlaff J, Altman DG, The PRISMA Group (2009). Preferred Reporting Items for Systematic Reviews and Meta-Analyses: The PRISMA Statement. PLoS Med 6(6): e1000097. doi:10.1371/journal.pmed1000097

For more information, visit [www.prisma-statement.org](http://www.prisma-statement.org).
